# Supplementary material for: N-Doped carbon coated NiCo2O4 nanorods for efficient electrocatalytic oxygen evolution
Source: Royal Society of Chemistry journal article supplement (doi:10.1039/d1qi00500f), 2021-01-01
Supplement: d1qi00500f1.pdf [file d1qi00500f1.pdf]

## Supporting Information

### **N-doped carbon coated NiCo<sub>2</sub>O<sub>4</sub> Nanorods for efficient electrocatalytic oxygen evolution**

Muhammad Ahmad,<sup>a</sup> Baojuan Xi,<sup>a</sup> Yu Gu,<sup>a</sup> and Shenglin Xiong\*<sup>a</sup>

<sup>a</sup> Key Laboratory of Colloid and Interface Chemistry, Ministry of Education, School of Chemistry and Chemical Engineering, State Key Laboratory of Crystal Materials, Shandong University, Jinan, 250100, P. R. China

\*Correspondence author. Email: chexsl@sdu.edu.cn (S.L.X)

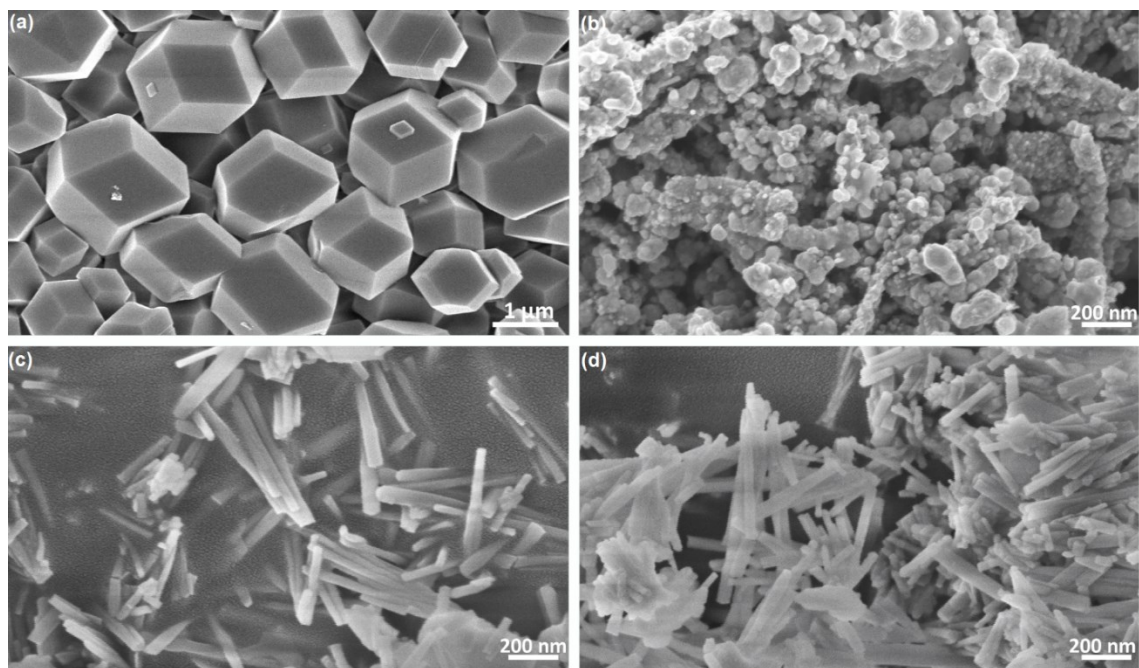

**Figure S1.** FESEM images of (a) ZIF-67, (b-d) ZIF-67@Ni-TPA after solvothermal reaction of 45 min, 2 h and 10 h, respectively.

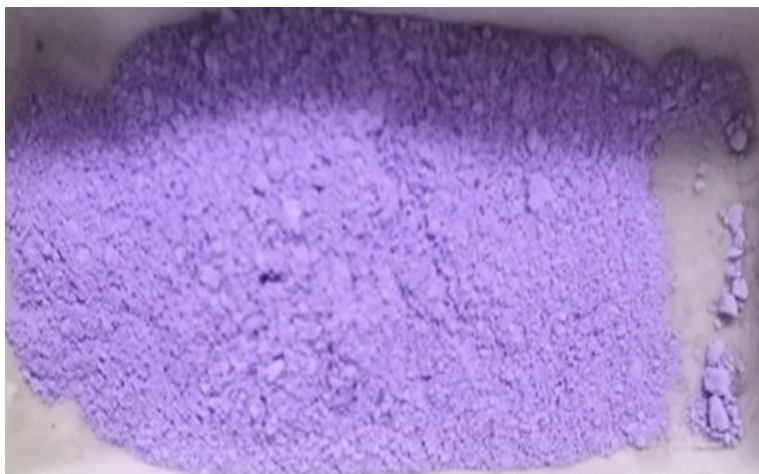

**Figure S2.** Lavender precipitates of ZIF-67@Ni-TPA.

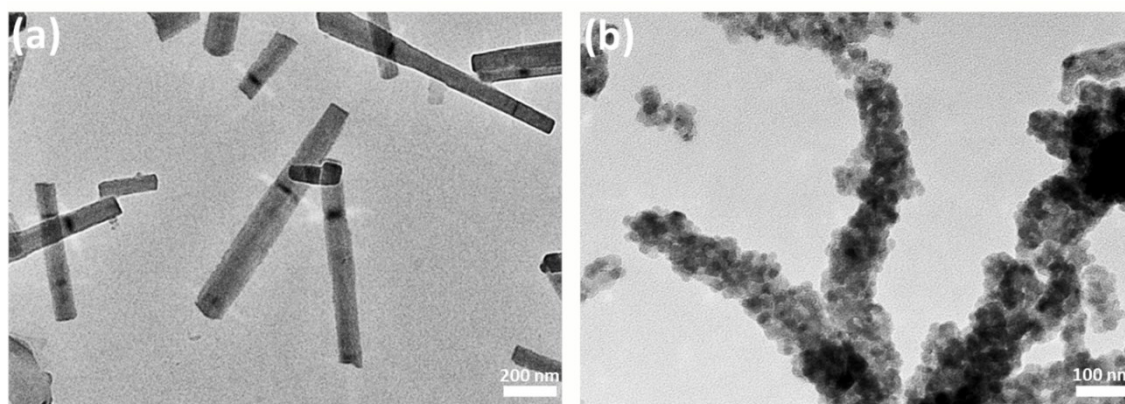

**Figure S3.** TEM images of (a) ZIF-67@Ni-TPA nanorods and (b) NiCo@NC nanorods.

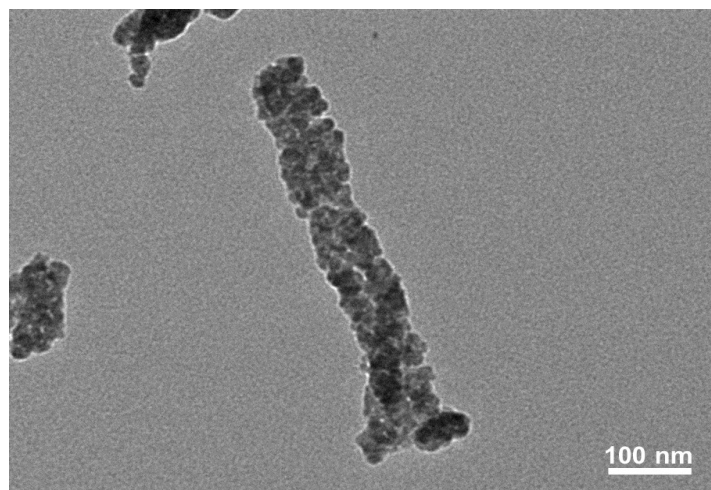

**Figure S4.** TEM image of NiCo<sub>2</sub>O<sub>4</sub>@NC nanorods after thermal reduction and oxidation process.

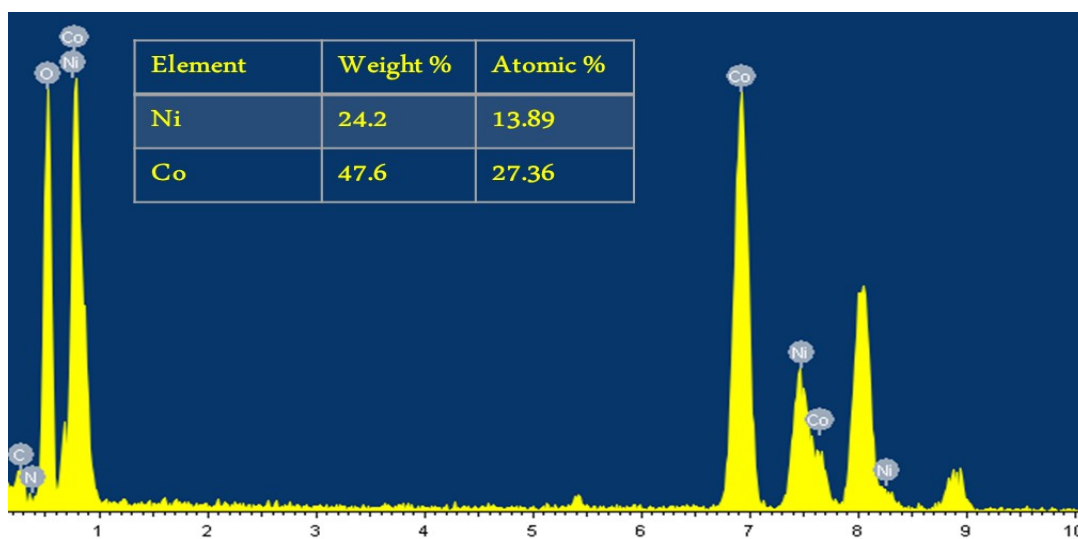

**Figure S5.** EDX spectrum of NiCo<sub>2</sub>O<sub>4</sub>@NC nanorods.

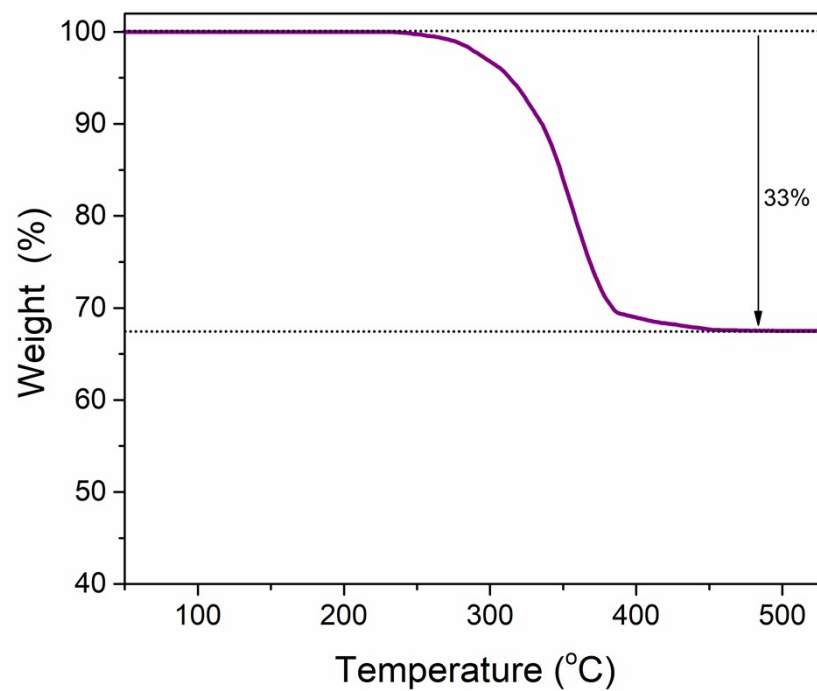

**Figure S6.** TGA curve of NiCo<sub>2</sub>O<sub>4</sub>@NC nanorods in the air atmosphere.

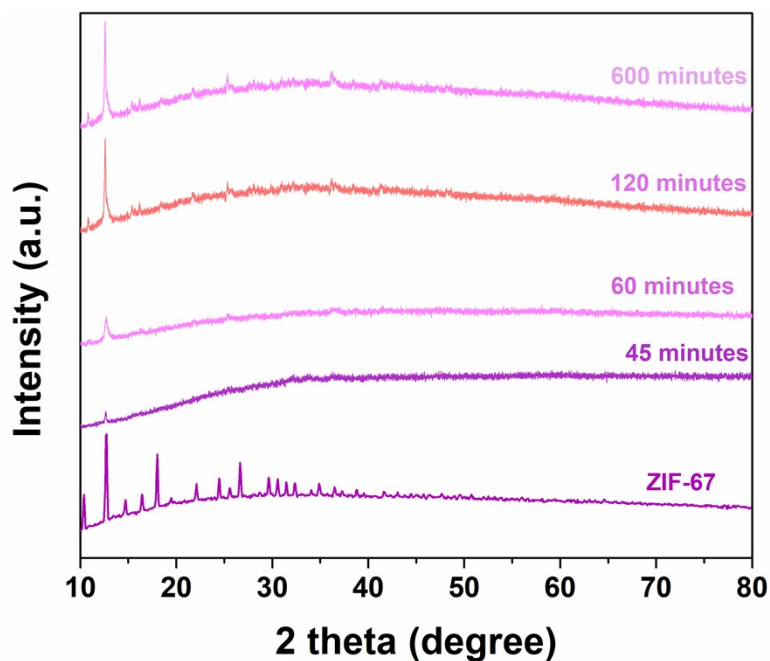

**Figure S7.** XRD patterns of ZIF-67 to ZIF-67@Ni-TPA obtained at different reaction time.

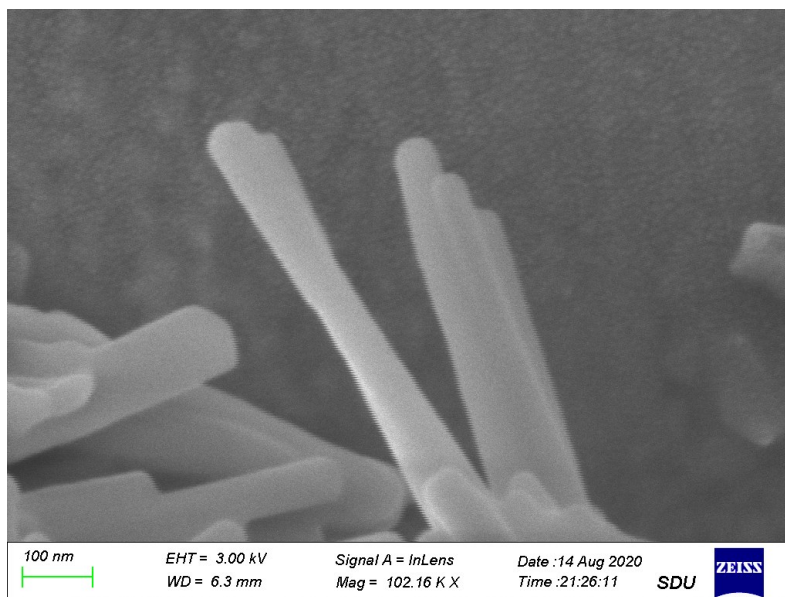

**Figure S8.** SEM image of NiCo<sub>2</sub>O<sub>4</sub> nanorods.

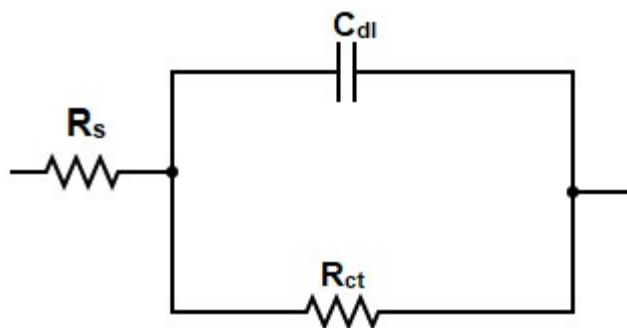

**Figure S9.** Equivalent circuit employed to calculate  $R_{ct}$  value.

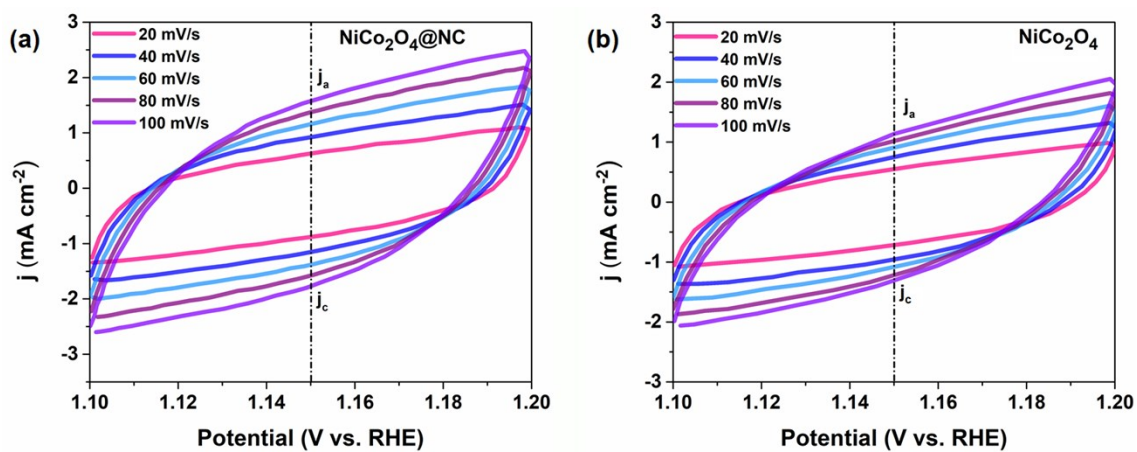

**Figure S10.** Cyclic voltammetry (CV) curves of electrocatalysts at various scan rates: (a)  $\text{NiCo}_2\text{O}_4@\text{NC}$ , (b)  $\text{NiCo}_2\text{O}_4$ .

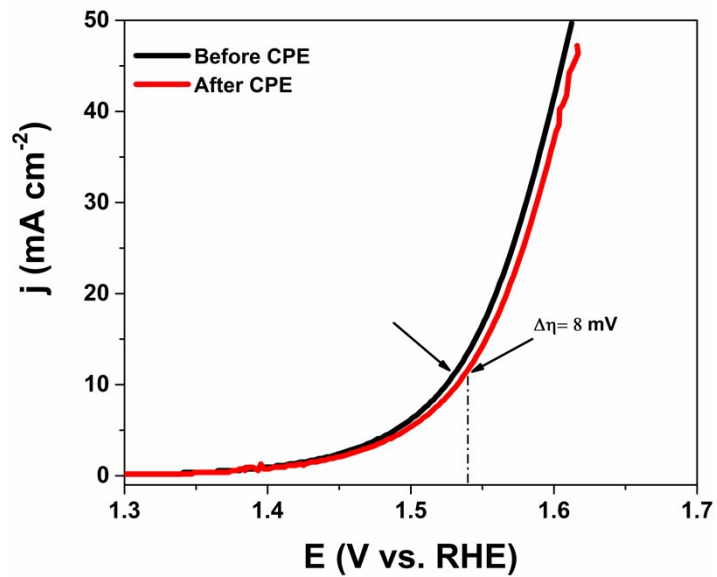

**Figure S11.** LSV curves of NiCo<sub>2</sub>O<sub>4</sub>@NC recorded before and after chronoamperometry measurement.



## Electrochemical measurements

### Exchange current density [(mA cm<sup>-2</sup>)]

Exchange current density can be calculated by considering charge/electron transfer resistance at electrode-electrolyte interphase using following equation (S1).

$$J_{exc} = RT/nAF\theta \quad (S1)$$

Where,

$R$  = universal gas constant (8.314 J/(mol.K)),  $T$ = temperature (298 K),  $n$ = number of electrons  $F$ = Faraday's constant (96485 C/mol),  $\theta$  = charge transfer resistance ( $\Omega$ ),  $A$ = geometrical area of working electrode.

### NiCo<sub>2</sub>O<sub>4</sub>@NC nanorods

$$\begin{aligned} & \frac{8.314 \frac{J}{mol.K} \times 298K}{4 \times 96485 \frac{C}{mol} \times 27 \Omega \times 0.196 cm^2} = 1.21 mA cm^{-2} \\ & = 1.21 mA cm^{-2} \end{aligned} \quad (S2)$$

### NiCo<sub>2</sub>O<sub>4</sub> nanorods

$$\begin{aligned} & \frac{8.314 \frac{J}{mol.K} \times 298K}{4 \times 96485 \frac{C}{mol} \times 37 \Omega \times 0.196 cm^2} = 0.8 mA cm^{-2} \\ & = 0.8 mA cm^{-2} \end{aligned} \quad (S3)$$

### NiCo@NC

$$\begin{aligned} & \frac{8.314 \frac{J}{mol.K} \times 298K}{4 \times 96485 \frac{C}{mol} \times 49 \Omega \times 0.196 cm^2} = 0.66 mA cm^{-2} \\ & = 0.66 mA cm^{-2} \end{aligned} \quad (S4)$$

### Active electrochemical surface area (ECSA)

$$ECSA = \frac{C_{dl}}{C_s} \quad (S5)$$

Where,  $C_{dl}$  = double layer capacitance and  $C_s$ = specific capacitance value for flat standards with 1 cm<sup>2</sup> of real surface area.

**Table S1. ICP-MS analysis:** Ni/Co compositions obtained from NiCo<sub>2</sub>O<sub>4</sub>@NC and NiCo<sub>2</sub>O<sub>4</sub> nanorods.

| Sample                               | Nickel<br>(mmol/L) ×<br>10 <sup>3</sup> | Cobalt<br>(mmol/L) × 10 <sup>3</sup> | Ni/Co  |
|--------------------------------------|-----------------------------------------|--------------------------------------|--------|
| NiCo <sub>2</sub> O <sub>4</sub> @NC | 0.292                                   | 0.585                                | 1/2    |
| NiCo <sub>2</sub> O <sub>4</sub>     | 0.276                                   | 0.549                                | 0.98/2 |

**Table S2.** Comparison of NiCo<sub>2</sub>O<sub>4</sub>@NC electrocatalyst with other reported electrocatalysts.

| Electrode material                                     | Overpotential (mV)<br>@10 mA cm <sup>-2</sup> | Tafel slope<br>(mv dec <sup>-1</sup> ) | References       |
|--------------------------------------------------------|-----------------------------------------------|----------------------------------------|------------------|
| NiCo <sub>2</sub> O <sub>4</sub> nanorods              | 420                                           | 101                                    | S1               |
| NiCo <sub>2</sub> O <sub>4</sub> nanoflowers           | 383                                           | 137                                    | S2               |
| Fe doped NiCo <sub>2</sub> O <sub>4</sub><br>nanowires | 297                                           | 68                                     | S3               |
| NiCo <sub>2</sub> O <sub>4</sub> core shell            | 320                                           | 63                                     | S4               |
| NiCo <sub>2</sub> O <sub>4</sub> nanobelts             | 325                                           | 71                                     | S5               |
| NiCo <sub>2</sub> O <sub>4</sub> @NC nanoflowers       | 383                                           | 53.5                                   | 27               |
| Ni/Co <sub>3</sub> O <sub>4</sub> @NC                  | 350                                           | 52.7                                   | S6               |
| NiCo <sub>2</sub> O <sub>4</sub> @NC nanorods          | 296                                           | 53                                     | <b>This work</b> |

## References

- S1 A. Dymerska, W. Kukułka, M. Biegun and E. Mijowska, Spinel of Nickel-Cobalt Oxide with Rod-Like Architecture as Electrocatalyst for Oxygen Evolution Reaction, *Materials*, 2020, **13**, 3918.
- S2 Z. Li, B. Li, J. Chen, Q. Pang and P. Shen, Spinel NiCo<sub>2</sub>O<sub>4</sub> 3-D nanoflowers supported on graphene nanosheets as efficient electrocatalyst for oxygen evolution reaction, *Int. J. Hydrogen Energy*, 2019, **44**, 16120–16131.
- S3 Z. Hao, P. Wei, H. Kang, Y. Yang, J. Li, X. Chen and L. Liu, Nickel cobalt oxide nanowires with iron incorporation realizing a promising electrocatalytic oxygen evolution reaction, *Nanotechnology*, 2020, **31**, 435707.

- S4 Z. Peng, D. Jia, A. M. Al-Enizi, A. A. Elzatahry and G. Zheng, From water oxidation to reduction: homologous Ni–Co based nanowires as complementary water splitting electrocatalysts, *Adv. Energy Mater.* 2015, **5**, 1402031.
- S5 S. Yao, H. Wei, Y. Zhang, X. Zhang, Y. Wang, J. Liu and Y. Wu, Controlled growth of porous oxygen-deficient NiCo<sub>2</sub>O<sub>4</sub> nanobelts as high-efficiency electrocatalysts for oxygen evolution reaction, *Catal. Sci. Technol.*, 2020, **11**, 264–271.
- S6 B. Dong, J-Y. Xie, Z. Tong, J-Q Chi, Y-N, Zhou, X. Ma, Z-Y. Lin, W. Lei and Y-M. Chai, Synergistic effect of metallic nickel and cobalt oxides with nitrogen-doped carbon nanospheres for highly efficient oxygen evolution, *Chinese J. Catal.*, 2020, **41**, 1782–1789.
